# Supplementary material for: The Mosaic Mutants of Cucumber: A Method to Produce Knock-Downs of Mitochondrial Transcripts
Source: PubMed Central journal article supplement (PMC4478549; doi:10.1534/g3.115.017053), 2015-04-14
Supplement: supp_g3.115.017053_017053SI.pdf [file supp_g3.115.017053_017053SI.pdf]

**Title: The mosaic (MSC) mutants of cucumber: a method to produce knock-downs of mitochondrial transcripts**

Angel R. Del Valle-Echevarria<sup>\*</sup>, Agnieszka Kielkowska<sup>§</sup>, Grzegorz Bartoszewski<sup>†</sup>, and Michael J. Havey<sup>\*‡</sup>

<sup>\*</sup>Department of Horticulture and <sup>‡</sup>USDA Agricultural Research Service, University of Wisconsin, Madison, Wisconsin, USA

<sup>§</sup>Faculty of Horticulture, Agricultural University of Krakow, Al. 29 Listopada 54, 31-425 Krakow, Poland

<sup>†</sup>Department of Plant Genetics, Breeding and Biotechnology, Faculty of Horticulture, Biotechnology and Landscape Architecture, Warsaw University of Life Sciences, ul. Nowoursynowska 159, 02-776 Warsaw, Poland

Sequence reads have been deposited into Genbank Sequence Read Archive SRP051771 (release date June 1, 2015). IRB number for recombinant DNA research at the University of Wisconsin is SC12-008R.

Corresponding author:

Dr. Michael J. Havey

USDA-ARS

Department of Horticulture

1575 Linden Drive

University of Wisconsin

Madison, WI 53706 USA

Phone: 608-262-1830

Fax: 608-262-4743

Email: [mjhavey@wisc.edu](mailto:mjhavey@wisc.edu)

**DOI: 10.1534/g3.115.017053**

**Table S1 Low-coverage regions in the mt DNA of the mitochondrial mutant MSC3, 12, and 16 as compared to the progenitor, wild-type inbred B.**

| Mutant Line | Region (bp) |         | Size (bp) | Chromosome* | Annotation                                                                                                                                    |
|-------------|-------------|---------|-----------|-------------|-----------------------------------------------------------------------------------------------------------------------------------------------|
|             | Start       | End     |           |             |                                                                                                                                               |
| MSC3        | 392,242     | 441,105 | 48,863    | MC          | <i>nad5ex4</i> (NADH dehydrogenase subunit 5 C-terminus); <i>trnW-CCA</i> (tRNA-Trp); <i>atp4</i> (ATPase subunit 4) and chloroplast-like DNA |
|             | 585,075     | 636,619 | 51,544    | MC          |                                                                                                                                               |
|             | 1           | 31,162  | 31,161    | 83.8 kb     |                                                                                                                                               |
|             | Total       |         | 131,568   | 7.8%        |                                                                                                                                               |
| MSC12       | 149,606     | 161,705 | 12,099    | MC          | <i>rps7</i> (ribosomal protein S7)<br>JLV5-Del (Lilly <i>et al.</i> 2001) was identified in MSC16)                                            |
|             | 195,676     | 267,406 | 71,730    | MC          |                                                                                                                                               |
|             | 347,550     | 362,669 | 15,119    | MC          |                                                                                                                                               |
|             | 567,690     | 568,518 | 828       | MC          |                                                                                                                                               |
|             | 572,554     | 622,942 | 50,388    | MC          |                                                                                                                                               |
|             | 911,926     | 917,574 | 5,648     | MC          |                                                                                                                                               |
|             | 22,564      | 25,406  | 2,842     | 44.8 kb     |                                                                                                                                               |
|             | 1           | 83,817  | 83,816    | 83.8 kb     |                                                                                                                                               |
| Total       |             | 242,470 | 14.4%     |             |                                                                                                                                               |
| MSC16       | 149,606     | 161,706 | 12,100    | MC          | <i>rps7</i> (ribosomal protein S7)<br>JLV5-Del (Lilly <i>et al.</i> 2001)                                                                     |
|             | 195,676     | 283,618 | 87,942    | MC          |                                                                                                                                               |
|             | 347,550     | 362,669 | 15,119    | MC          |                                                                                                                                               |
|             | 567,711     | 568,451 | 740       | MC          |                                                                                                                                               |
|             | 572,554     | 622,942 | 50,388    | MC          |                                                                                                                                               |
|             | 911,926     | 917,574 | 5,648     | MC          |                                                                                                                                               |
|             | 22,564      | 25,270  | 2,706     | 44.8 kb     |                                                                                                                                               |
|             | 1           | 83,817  | 83,816    | 83.8 kb     |                                                                                                                                               |
| Total       |             | 258,459 | 15.3%     |             |                                                                                                                                               |

MC = Master chromosome of 1.6 megabases (Mb).

44.8 kb = Extra-chromosome of 44.8 kb

83.8 kb = Extra-chromosome of 83.8 kb

\*All locations are based on the mitochondrial sequence of Alverson *et al.* (2011).

**Table S2 Fold change of copy number of mitochondrial and nuclear genes in wild-type inbred B and mitochondrial mutants MSC3, 12 and 16.**

| Gene                       | Line   | Average Fold-change | S.E. | t-test  |
|----------------------------|--------|---------------------|------|---------|
| <i>gadph</i> <sup>n</sup>  | Line B | 0.89                | 0.06 | CONTROL |
| <i>gadph</i> <sup>n</sup>  | MSC3   | 0.86                | 0.10 | 0.4059  |
| <i>gadph</i> <sup>n</sup>  | MSC12  | 0.79                | 0.05 | 0.1267  |
| <i>gadph</i> <sup>n</sup>  | MSC16  | 0.83                | 0.05 | 0.2371  |
| <i>actin3</i> <sup>n</sup> | Line B | 1.00                | 0.06 | CONTROL |
| <i>actin3</i> <sup>n</sup> | MSC3   | 1.21                | 0.08 | 0.0574  |
| <i>actin3</i> <sup>n</sup> | MSC12  | 1.05                | 0.04 | 0.2899  |
| <i>actin3</i> <sup>n</sup> | MSC16  | 1.08                | 0.08 | 0.2600  |
| <i>nad9</i>                | Line B | 1.00                | 0.02 | CONTROL |
| <i>nad9</i>                | MSC3   | 1.38                | 0.22 | 0.0782  |
| <i>nad9</i>                | MSC12  | 2.60                | 0.25 | 0.0016* |
| <i>nad9</i>                | MSC16  | 1.88                | 0.16 | 0.0031* |
| <i>cob</i>                 | Line B | 1.00                | 0.02 | CONTROL |
| <i>cob</i>                 | MSC3   | 1.29                | 0.05 | 0.0034* |
| <i>cob</i>                 | MSC12  | 1.47                | 0.20 | 0.0400* |
| <i>cob</i>                 | MSC16  | 1.32                | 0.08 | 0.0096* |
| <i>rps7</i>                | Line B | 1.02                | 0.15 | CONTROL |
| <i>rps7</i>                | MSC3   | 0.92                | 0.16 | 0.3371  |
| <i>rps7</i>                | MSC12  | 0.12                | 0.04 | 0.0021* |
| <i>rps7</i>                | MSC16  | 0.12                | 0.05 | 0.0023* |
| <i>ccmFc</i>               | Line B | 1.00                | 0.04 | CONTROL |
| <i>ccmFc</i>               | MSC3   | 1.31                | 0.16 | 0.0715  |
| <i>ccmFc</i>               | MSC12  | 2.09                | 0.32 | 0.0143* |

|                         |        |      |      |         |
|-------------------------|--------|------|------|---------|
| <i>ccmFc</i>            | MSC16  | 2.38 | 0.75 | 0.0716  |
| <i>nad7</i>             | Line B | 1.00 | 0.07 | CONTROL |
| <i>nad7</i>             | MSC3   | 1.04 | 0.12 | 0.4124  |
| <i>nad7</i>             | MSC12  | 1.23 | 0.18 | 0.1535  |
| <i>nad7</i>             | MSC16  | 1.08 | 0.12 | 0.2998  |
| <i>ccmB</i>             | Line B | 1.05 | 0.23 | CONTROL |
| <i>ccmB</i>             | MSC3   | 1.30 | 0.21 | 0.2366  |
| <i>ccmB</i>             | MSC12  | 1.68 | 0.17 | 0.0482* |
| <i>ccmB</i>             | MSC16  | 1.59 | 0.28 | 0.1039  |
| <i>atp1</i>             | Line B | 1.03 | 0.16 | CONTROL |
| <i>atp1</i>             | MSC3   | 1.16 | 0.14 | 0.2794  |
| <i>atp1</i>             | MSC12  | 2.22 | 0.26 | 0.0089* |
| <i>atp1</i>             | MSC16  | 2.42 | 0.24 | 0.0042* |
| <i>cox1</i>             | Line B | 1.01 | 0.10 | CONTROL |
| <i>cox1</i>             | MSC3   | 1.20 | 0.25 | 0.2568  |
| <i>cox1</i>             | MSC12  | 1.71 | 0.17 | 0.0116* |
| <i>cox1</i>             | MSC16  | 2.04 | 0.28 | 0.0127* |
| <i>nad6</i>             | Line B | 1.01 | 0.10 | CONTROL |
| <i>nad6</i>             | MSC3   | 1.27 | 0.14 | 0.0985  |
| <i>nad6</i>             | MSC12  | 2.15 | 0.17 | 0.0023* |
| <i>nad6</i>             | MSC16  | 2.38 | 0.25 | 0.0039* |
| <i>ubqc<sup>n</sup></i> | Line B | 1.00 | 0.00 | CONTROL |
| <i>ubqc<sup>n</sup></i> | MSC3   | 1.11 | 0.12 | 0.2041  |
| <i>ubqc<sup>n</sup></i> | MSC12  | 1.05 | 0.09 | 0.2886  |
| <i>ubqc<sup>n</sup></i> | MSC16  | 1.03 | 0.10 | 0.3820  |
| <i>sdh3</i>             | Line B | 1.04 | 0.25 | CONTROL |

|             |        |      |      |         |
|-------------|--------|------|------|---------|
| <i>sdh3</i> | MSC3   | 1.23 | 0.07 | 0.2100  |
| <i>sdh3</i> | MSC12  | 2.09 | 0.09 | 0.0048* |
| <i>sdh3</i> | MSC16  | 2.16 | 0.36 | 0.0265* |
| <i>nad3</i> | Line B | 1.02 | 0.16 | CONTROL |
| <i>nad3</i> | MSC3   | 1.43 | 0.16 | 0.0741  |
| <i>nad3</i> | MSC12  | 2.00 | 0.08 | 0.0029* |
| <i>nad3</i> | MSC16  | 1.88 | 0.33 | 0.0402* |
| <i>rrn5</i> | Line B | 1.01 | 0.12 | CONTROL |
| <i>rrn5</i> | MSC3   | 1.05 | 0.10 | 0.4057  |
| <i>rrn5</i> | MSC12  | 1.17 | 0.00 | 0.1311  |
| <i>rrn5</i> | MSC16  | 1.26 | 0.05 | 0.0683  |
| <i>rpl2</i> | Line B | 1.00 | 0.04 | CONTROL |
| <i>rpl2</i> | MSC3   | 1.00 | 0.08 | 0.4799  |
| <i>rpl2</i> | MSC12  | 1.86 | 0.07 | 0.0003* |
| <i>rpl2</i> | MSC16  | 2.10 | 0.12 | 0.0006* |
| <i>rps3</i> | Line B | 1.01 | 0.12 | CONTROL |
| <i>rps3</i> | MSC3   | 1.40 | 0.16 | 0.0660  |
| <i>rps3</i> | MSC12  | 2.31 | 0.20 | 0.0025* |
| <i>rps3</i> | MSC16  | 2.53 | 0.20 | 0.0015* |
| <i>rpl5</i> | Line B | 1.00 | 0.07 | CONTROL |
| <i>rpl5</i> | MSC3   | 1.38 | 0.19 | 0.0710  |
| <i>rpl5</i> | MSC12  | 2.05 | 0.32 | 0.0171* |
| <i>rpl5</i> | MSC16  | 2.86 | 0.34 | 0.0030* |
| <i>nad5</i> | Line B | 1.03 | 0.19 | CONTROL |
| <i>nad5</i> | MSC3   | 0.36 | 0.11 | 0.0194* |
| <i>nad5</i> | MSC12  | 1.85 | 0.39 | 0.0661  |

|                           |        |       |       |         |
|---------------------------|--------|-------|-------|---------|
| <i>nad5</i>               | MSC16  | 1.47  | 0.20  | 0.0931  |
| <i>atp4</i>               | Line B | 1.03  | 0.19  | CONTROL |
| <i>atp4</i>               | MSC3   | 0.43  | 0.04  | 0.0182* |
| <i>atp4</i>               | MSC12  | 1.69  | 0.31  | 0.0724  |
| <i>atp4</i>               | MSC16  | 1.88  | 0.19  | 0.0170* |
| <i>rrn5</i>               | Line B | 1.01  | 0.12  | CONTROL |
| <i>rrn5</i>               | MSC3   | 1.06  | 0.11  | 0.4046  |
| <i>rrn5</i>               | MSC12  | 1.29  | 0.06  | 0.0556  |
| <i>rrn5</i>               | MSC16  | 1.39  | 0.11  | 0.0432* |
| <i>aox<sup>nm</sup></i>   | Line B | 1.00  | 0.07  | CONTROL |
| <i>aox<sup>nm</sup></i>   | MSC3   | 1.21  | 0.22  | 0.2082  |
| <i>aox<sup>nm</sup></i>   | MSC12  | 1.00  | 0.07  | 0.4992  |
| <i>aox<sup>nm</sup></i>   | MSC16  | 1.24  | 0.10  | 0.0640  |
| <i>porin<sup>nm</sup></i> | Line B | 1.16  | 0.47  | CONTROL |
| <i>porin<sup>nm</sup></i> | MSC3   | 34.74 | 33.31 | 0.1853  |
| <i>porin<sup>nm</sup></i> | MSC12  | 0.80  | 0.20  | 0.2589  |
| <i>porin<sup>nm</sup></i> | MSC16  | 2.34  | 1.03  | 0.1788  |
| <i>cox2</i>               | Line B | 1.00  | 0.07  | CONTROL |
| <i>cox2</i>               | MSC3   | 1.12  | 0.30  | 0.3596  |
| <i>cox2</i>               | MSC12  | 1.79  | 0.14  | 0.0040* |
| <i>cox2</i>               | MSC16  | 1.95  | 0.04  | 0.0002* |
| <i>rps13</i>              | Line B | 1.04  | 0.21  | CONTROL |
| <i>rps13</i>              | MSC3   | 1.33  | 0.23  | 0.1968  |
| <i>rps13</i>              | MSC12  | 2.19  | 0.00  | 0.0025* |
| <i>rps13</i>              | MSC16  | 2.05  | 0.30  | 0.0253* |
| <i>mttb</i>               | Line B | 1.06  | 0.26  | CONTROL |

|              |        |      |      |         |
|--------------|--------|------|------|---------|
| <i>mttb</i>  | MSC3   | 1.42 | 0.11 | 0.1383  |
| <i>mttb</i>  | MSC12  | 2.46 | 0.06 | 0.0033* |
| <i>mttb</i>  | MSC16  | 2.26 | 0.23 | 0.0130* |
| <i>rps10</i> | Line B | 1.00 | 0.08 | CONTROL |
| <i>rps10</i> | MSC3   | 1.12 | 0.05 | 0.1431  |
| <i>rps10</i> | MSC12  | 2.02 | 0.24 | 0.0080* |
| <i>rps10</i> | MSC16  | 2.25 | 0.13 | 0.0007* |
| <i>atp8</i>  | Line B | 1.00 | 0.04 | CONTROL |
| <i>atp8</i>  | MSC3   | 1.15 | 0.09 | 0.0998  |
| <i>atp8</i>  | MSC12  | 1.55 | 0.04 | 0.0003* |
| <i>atp8</i>  | MSC16  | 1.82 | 0.04 | 0.0001* |
| <i>rrnL</i>  | Line B | 1.00 | 0.04 | CONTROL |
| <i>rrnL</i>  | MSC3   | 1.25 | 0.15 | 0.0952  |
| <i>rrnL</i>  | MSC12  | 3.03 | 0.68 | 0.0207* |
| <i>rrnL</i>  | MSC16  | 2.25 | 0.53 | 0.0400* |

\* Significant difference between an MSC mutant for a given mitochondrial or nuclear gene compared to wild-type B at  $\alpha = 0.05$ , Student's t-test.

<sup>n</sup> Nuclear-encoded gene with no function in the mitochondria.

<sup>nm</sup> Nuclear-encoded mitochondrially targeted gene.

**Table S3 Fold change in transcript levels of mitochondrial and nuclear genes from wild-type inbred B and mitochondrial mutants MSC3, 12 and 16.**

| Gene        | Line   | Average Fold-change | S.E. | t-test  |
|-------------|--------|---------------------|------|---------|
| <i>rps7</i> | Line B | 1.12                | 0.18 | CONTROL |
| <i>rps7</i> | MSC3   | 2.32                | 0.34 | 0.0044* |
| <i>rps7</i> | MSC12  | 0.21                | 0.07 | 0.0005* |
| <i>rps7</i> | MSC16  | 0.36                | 0.08 | 0.0016* |
| <i>rrn5</i> | Line B | 1.05                | 0.12 | CONTROL |
| <i>rrn5</i> | MSC3   | 1.67                | 0.49 | 0.1246  |
| <i>rrn5</i> | MSC12  | 1.15                | 0.19 | 0.3181  |
| <i>rrn5</i> | MSC16  | 1.16                | 0.16 | 0.2837  |
| <i>rpl2</i> | Line B | 1.09                | 0.37 | CONTROL |
| <i>rpl2</i> | MSC3   | 1.76                | 0.47 | 0.0148* |
| <i>rpl2</i> | MSC12  | 2.00                | 0.29 | 0.0087* |
| <i>rpl2</i> | MSC16  | 2.00                | 0.31 | 0.0118* |
| <i>nad3</i> | Line B | 1.31                | 0.32 | CONTROL |
| <i>nad3</i> | MSC3   | 2.06                | 0.46 | 0.1028  |
| <i>nad3</i> | MSC12  | 2.92                | 0.46 | 0.0041* |
| <i>nad3</i> | MSC16  | 4.75                | 1.14 | 0.0087* |
| <i>sdh3</i> | Line B | 1.08                | 0.16 | CONTROL |
| <i>sdh3</i> | MSC3   | 2.08                | 0.48 | 0.0395* |
| <i>sdh3</i> | MSC12  | 2.05                | 0.43 | 0.0256* |
| <i>sdh3</i> | MSC16  | 1.85                | 0.42 | 0.0583  |
| <i>nad6</i> | Line B | 1.23                | 0.28 | CONTROL |
| <i>nad6</i> | MSC3   | 1.55                | 0.31 | 0.2295  |
| <i>nad6</i> | MSC12  | 2.54                | 0.64 | 0.0379* |



|                           |        |      |      |         |
|---------------------------|--------|------|------|---------|
| <i>nad6</i>               | MSC16  | 2.57 | 0.66 | 0.0435* |
| <i>ubqc<sup>n</sup></i>   | Line B | 1.09 | 0.35 | CONTROL |
| <i>ubqc<sup>n</sup></i>   | MSC3   | 1.51 | 0.80 | 0.1613  |
| <i>ubqc<sup>n</sup></i>   | MSC12  | 1.11 | 0.21 | 0.4583  |
| <i>ubqc<sup>n</sup></i>   | MSC16  | 1.36 | 0.25 | 0.1873  |
| <i>nad9</i>               | Line B | 1.43 | 0.48 | CONTROL |
| <i>nad9</i>               | MSC3   | 2.13 | 0.40 | 0.1391  |
| <i>nad9</i>               | MSC12  | 4.40 | 1.11 | 0.0122* |
| <i>nad9</i>               | MSC16  | 5.21 | 1.71 | 0.0309* |
| <i>cob</i>                | Line B | 1.19 | 0.25 | CONTROL |
| <i>cob</i>                | MSC3   | 1.92 | 0.26 | 0.0301* |
| <i>cob</i>                | MSC12  | 2.13 | 0.34 | 0.0156* |
| <i>cob</i>                | MSC16  | 3.13 | 0.71 | 0.0142* |
| <i>actin3<sup>n</sup></i> | Line B | 3.46 | 2.54 | CONTROL |
| <i>actin3<sup>n</sup></i> | MSC3   | 3.15 | 0.86 | 0.4545  |
| <i>actin3<sup>n</sup></i> | MSC12  | 2.88 | 1.41 | 0.4222  |
| <i>actin3<sup>n</sup></i> | MSC16  | 3.99 | 0.87 | 0.4244  |
| <i>rps10</i>              | Line B | 1.19 | 0.50 | CONTROL |
| <i>rps10</i>              | MSC3   | 1.90 | 1.32 | 0.1541  |
| <i>rps10</i>              | MSC12  | 1.89 | 0.41 | 0.0790  |
| <i>rps10</i>              | MSC16  | 2.64 | 0.53 | 0.0143* |
| <i>rps3</i>               | Line B | 1.09 | 0.17 | CONTROL |
| <i>rps3</i>               | MSC3   | 1.21 | 0.20 | 0.3276  |
| <i>rps3</i>               | MSC12  | 2.04 | 0.34 | 0.0097* |
| <i>rps3</i>               | MSC16  | 1.93 | 0.37 | 0.0328* |
| <i>mttb</i>               | Line B | 1.07 | 0.16 | CONTROL |

|                         |        |      |      |         |
|-------------------------|--------|------|------|---------|
| <i>mttb</i>             | MSC3   | 1.57 | 0.34 | 0.1084  |
| <i>mttb</i>             | MSC12  | 2.01 | 0.32 | 0.0067* |
| <i>mttb</i>             | MSC16  | 1.82 | 0.24 | 0.0113* |
| <i>atp4</i>             | Line B | 1.03 | 0.09 | CONTROL |
| <i>atp4</i>             | MSC3   | 0.47 | 0.07 | 0.0001* |
| <i>atp4</i>             | MSC12  | 1.12 | 0.19 | 0.3112  |
| <i>atp4</i>             | MSC16  | 1.01 | 0.14 | 0.4523  |
| <i>cox2</i>             | Line B | 1.03 | 0.18 | CONTROL |
| <i>cox2</i>             | MSC3   | 1.12 | 0.24 | 0.2669  |
| <i>cox2</i>             | MSC12  | 1.25 | 0.15 | 0.1114  |
| <i>cox2</i>             | MSC16  | 1.32 | 0.18 | 0.0917  |
| <i>aox<sup>nm</sup></i> | Line B | 1.03 | 0.10 | CONTROL |
| <i>aox<sup>nm</sup></i> | MSC3   | 1.94 | 0.22 | 0.0017* |
| <i>aox<sup>nm</sup></i> | MSC12  | 2.33 | 0.27 | 0.0003* |
| <i>aox<sup>nm</sup></i> | MSC16  | 2.66 | 0.35 | 0.0007* |
| <i>rrnS</i>             | Line B | 1.06 | 0.13 | CONTROL |
| <i>rrnS</i>             | MSC3   | 1.35 | 0.18 | 0.1090  |
| <i>rrnS</i>             | MSC12  | 0.73 | 0.12 | 0.0383* |
| <i>rrnS</i>             | MSC16  | 0.82 | 0.11 | 0.0905  |
| <i>rps13</i>            | Line B | 1.10 | 0.17 | CONTROL |
| <i>rps13</i>            | MSC3   | 1.35 | 0.11 | 0.1150  |
| <i>rps13</i>            | MSC12  | 2.85 | 0.39 | 0.0003* |
| <i>rps13</i>            | MSC16  | 2.82 | 0.71 | 0.0213* |
| <i>rpl5</i>             | Line B | 1.09 | 0.39 | CONTROL |
| <i>rpl5</i>             | MSC3   | 1.81 | 0.45 | 0.0112* |
| <i>rpl5</i>             | MSC12  | 2.27 | 0.57 | 0.0396* |

|             |        |      |      |         |
|-------------|--------|------|------|---------|
| <i>rpl5</i> | MSC16  | 2.05 | 0.23 | 0.0026* |
| <i>atp8</i> | Line B | 1.02 | 0.08 | CONTROL |
| <i>atp8</i> | MSC3   | 1.09 | 0.23 | 0.3999  |
| <i>atp8</i> | MSC12  | 1.33 | 0.23 | 0.0916  |
| <i>atp8</i> | MSC16  | 1.45 | 0.22 | 0.0504  |
| <i>nad5</i> | Line B | 1.13 | 0.22 | CONTROL |
| <i>nad5</i> | MSC3   | 0.14 | 0.02 | 0.0011* |
| <i>nad5</i> | MSC12  | 1.28 | 0.34 | 0.3535  |
| <i>nad5</i> | MSC16  | 1.16 | 0.27 | 0.4686  |
| <i>rrnL</i> | Line B | 1.06 | 0.12 | CONTROL |
| <i>rrnL</i> | MSC3   | 1.15 | 0.21 | 0.3519  |
| <i>rrnL</i> | MSC12  | 1.19 | 0.30 | 0.3461  |
| <i>rrnL</i> | MSC16  | 1.51 | 0.28 | 0.0843  |
| <i>cox1</i> | Line B | 1.13 | 0.41 | CONTROL |
| <i>cox1</i> | MSC3   | 1.58 | 0.68 | 0.1262  |
| <i>cox1</i> | MSC12  | 1.85 | 0.58 | 0.1347  |
| <i>cox1</i> | MSC16  | 3.07 | 1.03 | 0.0500* |
| <i>atp1</i> | Line B | 1.11 | 0.19 | CONTROL |
| <i>atp1</i> | MSC3   | 2.05 | 0.24 | 0.0039* |
| <i>atp1</i> | MSC12  | 1.77 | 0.57 | 0.1510  |
| <i>atp1</i> | MSC16  | 1.91 | 0.50 | 0.0849  |
| <i>nad1</i> | Line B | 1.03 | 0.08 | CONTROL |
| <i>nad1</i> | MSC3   | 0.95 | 0.14 | 0.3251  |
| <i>nad1</i> | MSC12  | 1.08 | 0.32 | 0.4367  |
| <i>nad1</i> | MSC16  | 1.18 | 0.31 | 0.3286  |
| <i>nad7</i> | Line B | 1.05 | 0.11 | CONTROL |

|                           |        |      |      |         |
|---------------------------|--------|------|------|---------|
| <i>nad7</i>               | MSC3   | 1.16 | 0.16 | 0.2910  |
| <i>nad7</i>               | MSC12  | 1.06 | 0.25 | 0.4889  |
| <i>nad7</i>               | MSC16  | 1.19 | 0.25 | 0.3109  |
| <i>ccmB</i>               | Line B | 1.10 | 0.31 | CONTROL |
| <i>ccmB</i>               | MSC3   | 2.15 | 1.41 | 0.0784  |
| <i>ccmB</i>               | MSC12  | 1.55 | 0.19 | 0.0400* |
| <i>ccmB</i>               | MSC16  | 2.30 | 0.40 | 0.0090* |
| <i>porin</i> <sup>n</sup> | Line B | 1.08 | 0.15 | CONTROL |
| <i>porin</i> <sup>n</sup> | MSC3   | 1.01 | 0.19 | 0.3941  |
| <i>porin</i> <sup>n</sup> | MSC12  | 0.80 | 0.23 | 0.1624  |
| <i>porin</i> <sup>n</sup> | MSC16  | 0.87 | 0.16 | 0.1690  |
| <i>ccmFc</i>              | Line B | 1.08 | 0.15 | CONTROL |
| <i>ccmFc</i>              | MSC3   | 1.34 | 0.22 | 0.1781  |
| <i>ccmFc</i>              | MSC12  | 2.81 | 0.71 | 0.0176* |
| <i>ccmFc</i>              | MSC16  | 2.34 | 0.47 | 0.0145* |
| <i>gadph</i> <sup>n</sup> | Line B | 1.03 | 0.08 | CONTROL |
| <i>gadph</i> <sup>n</sup> | MSC3   | 1.32 | 0.17 | 0.0829  |
| <i>gadph</i> <sup>n</sup> | MSC12  | 1.17 | 0.17 | 0.2137  |
| <i>gadph</i> <sup>n</sup> | MSC16  | 1.14 | 0.26 | 0.3495  |

\* Significant difference between an MSC mutant for a given mitochondrial or nuclear gene compared to wild-type

B at  $\alpha = 0.05$ , Student's t-test.

<sup>n</sup> Nuclear-encoded gene with no function in the mitochondria.

<sup>nm</sup> Nuclear-encoded mitochondrially targeted gene.

**Table S4 Primer sequences that were used for quantitative-PCR.**

| Location    | Gene            | Forward Primer          | Reverse Primer          |
|-------------|-----------------|-------------------------|-------------------------|
| Nuclear     | <i>gadph</i>    | AGGAAGAGTCCGAGGGAAAA    | ACGAGGATGTGAAGCCAAAC    |
|             | <i>aox2</i>     | GCACCATCAGCCCAAAAC      | AGCATCCCTCCAACCATTTC    |
|             | <i>ubqc</i>     | CACAGCTCGATATTGGACAGA   | AATTTTCATCCCAACCCACA    |
|             | <i>actin3</i>   | CCAAGGCGAATAGAGAGAAAA   | GCAACATACATAGCGGGAGTG   |
| Complex I   | <i>nad9</i>     | ACAAACCAGTGCAGACGAAG    | CCGGATGATTGATGGAAGAA    |
|             | <i>nad7</i>     | GCAGCACCTTACGATGTTCA    | TGTCGCATCTCTTCGATACG    |
|             | <i>nad6</i>     | TCCGTCTGGTTTTTGTCTTC    | GTGGTTCTGTCGTCCTCCTC    |
|             | <i>nad3</i>     | CACTCGGTCTTCCTTTTCCA    | AACGACTTCTGGCATCACC     |
|             | <i>nad5 ex4</i> | AGGATATTAGGGGAAGCAGTGAG | CCAAGAAGATAGAGAGTCCCACA |
| Complex II  | <i>sdh3</i>     | TGGGTTTGATTTGCTTCACC    | CGACGGATATTAGGATGAGCTTT |
| Complex III | <i>cob</i>      | CTTGGTGAATAGGGCGAAAA    | TGACAAAGCGGGAGGTGTAG    |
| Complex IV  | <i>cox1</i>     | TTCCCATGCATTTCTTAGGG    | AACGACGAATCCCAACTACG    |
|             | <i>cox2</i>     | GATCTCAAGACGCAGCAACA    | CATAAAGCGCGAACCAAGA     |
|             | <i>ccmFc</i>    | GCCTCATTTCTTTCTTCC      | TCACGTTTCGCTGAACTATG    |
|             | <i>ccmB</i>     | CGGAATGGATCGGTAAACA     | AAGAGCCGAACGAGAATGAA    |
| Complex V   | <i>atp1</i>     | TGAAACACAAGCTGGAGACG    | ACACGACTGACGGATAAGCC    |
|             | <i>atp4</i>     | GCAGCAATTTCCAATCCT      | TGCACTGTCTTTTCGCACTT    |
|             | <i>atp8</i>     | TGCCTTTCTTCTTGACTTTCT   | TCCTTGCTCCGTATGTTCTTC   |
| Ribosome LU | <i>rpl2</i>     | AGCCAAGAGGGGAGAGCA      | CCGAGAAGAACGATTAGGG     |
|             | <i>rpl5</i>     | GCCCGGAGAATTTAAGAAAGA   | TGACCTAGCACGAGAAAGCA    |
|             | <i>rrnL</i>     | GTCAGCGAGAAAATGGGAAC    | CGGGTCAAATAGGAAGAACGA   |
| Ribosome SU | <i>rrn5</i>     | AGCGATCGACGTGAAAACAC    | TCCTTCATTAAGCCGC        |
|             | <i>rrnS</i>     | TGCGCTTTAGTTTGATTGCT    | AGTCTGAGGACCCGTTTTGG    |
|             | <i>rps7</i>     | TGACGATCCCTGGCTACAA     | ATGGTTGAGGCCGTAGAGAA    |
|             | <i>rps13</i>    | GTCTGCTCGTTCTCCCCTCT    | AAAAAGCCATTACAGTTTCGTT  |
|             | <i>rps10</i>    | GGAAGATTGGATTGCCTGAA    | ATGCCTTTCTGTTTTATGACC   |
|             | <i>rps3</i>     | GGAGCGAATACACAGGGAAG    | CGAAGAAAGGAAAGAGCGAGA   |
