# Supplementary material for: The Mosaic Mutants of Cucumber: A Method to Produce Knock-Downs of Mitochondrial Transcripts
Source: PubMed Central journal article supplement (PMC4478549; doi:10.1534/g3.115.017053), 2015-04-14
Supplement: supp_g3.115.017053_TableS1.pdf [file supp_g3.115.017053_TableS1.pdf]

**Table S1 Low-coverage regions in the mt DNA of the mitochondrial mutant MSC3, 12, and 16 as compared to the progenitor, wild-type inbred B.**

| Mutant Line | Region (bp) |         | Size (bp) | Chromosome* | Annotation                                                                                                                                    |
|-------------|-------------|---------|-----------|-------------|-----------------------------------------------------------------------------------------------------------------------------------------------|
|             | Start       | End     |           |             |                                                                                                                                               |
| MSC3        | 392,242     | 441,105 | 48,863    | MC          | <i>nad5ex4</i> (NADH dehydrogenase subunit 5 C-terminus); <i>trnW-CCA</i> (tRNA-Trp); <i>atp4</i> (ATPase subunit 4) and chloroplast-like DNA |
|             | 585,075     | 636,619 | 51,544    | MC          |                                                                                                                                               |
|             | 1           | 31,162  | 31,161    | 83.8 kb     |                                                                                                                                               |
|             | Total       |         | 131,568   | 7.8%        |                                                                                                                                               |
| MSC12       | 149,606     | 161,705 | 12,099    | MC          | <i>rps7</i> (ribosomal protein S7)<br>JLV5-Del (Lilly <i>et al.</i> 2001) was identified in MSC16)                                            |
|             | 195,676     | 267,406 | 71,730    | MC          |                                                                                                                                               |
|             | 347,550     | 362,669 | 15,119    | MC          |                                                                                                                                               |
|             | 567,690     | 568,518 | 828       | MC          |                                                                                                                                               |
|             | 572,554     | 622,942 | 50,388    | MC          |                                                                                                                                               |
|             | 911,926     | 917,574 | 5,648     | MC          |                                                                                                                                               |
|             | 22,564      | 25,406  | 2,842     | 44.8 kb     |                                                                                                                                               |
|             | 1           | 83,817  | 83,816    | 83.8 kb     |                                                                                                                                               |
| Total       |             | 242,470 | 14.4%     |             |                                                                                                                                               |
| MSC16       | 149,606     | 161,706 | 12,100    | MC          | <i>rps7</i> (ribosomal protein S7)<br>JLV5-Del (Lilly <i>et al.</i> 2001)                                                                     |
|             | 195,676     | 283,618 | 87,942    | MC          |                                                                                                                                               |
|             | 347,550     | 362,669 | 15,119    | MC          |                                                                                                                                               |
|             | 567,711     | 568,451 | 740       | MC          |                                                                                                                                               |
|             | 572,554     | 622,942 | 50,388    | MC          |                                                                                                                                               |
|             | 911,926     | 917,574 | 5,648     | MC          |                                                                                                                                               |
|             | 22,564      | 25,270  | 2,706     | 44.8 kb     |                                                                                                                                               |
|             | 1           | 83,817  | 83,816    | 83.8 kb     |                                                                                                                                               |
| Total       |             | 258,459 | 15.3%     |             |                                                                                                                                               |

MC = Master chromosome of 1.6 megabases (Mb).

44.8 kb = Extra-chromosome of 44.8 kb

83.8 kb = Extra-chromosome of 83.8 kb

\*All locations are based on the mitochondrial sequence of Alverson *et al.* (2011).
