# Supplementary material for: The Mosaic Mutants of Cucumber: A Method to Produce Knock-Downs of Mitochondrial Transcripts
Source: PubMed Central journal article supplement (PMC4478549; doi:10.1534/g3.115.017053), 2015-04-14
Supplement: supp_g3.115.017053_TableS2.pdf [file supp_g3.115.017053_TableS2.pdf]

**Table S2 Fold change of copy number of mitochondrial and nuclear genes in wild-type inbred B and mitochondrial mutants MSC3, 12 and 16.**

| Gene                       | Line   | Average Fold-change | S.E. | t-test  |
|----------------------------|--------|---------------------|------|---------|
| <i>gadph</i> <sup>n</sup>  | Line B | 0.89                | 0.06 | CONTROL |
| <i>gadph</i> <sup>n</sup>  | MSC3   | 0.86                | 0.10 | 0.4059  |
| <i>gadph</i> <sup>n</sup>  | MSC12  | 0.79                | 0.05 | 0.1267  |
| <i>gadph</i> <sup>n</sup>  | MSC16  | 0.83                | 0.05 | 0.2371  |
| <i>actin3</i> <sup>n</sup> | Line B | 1.00                | 0.06 | CONTROL |
| <i>actin3</i> <sup>n</sup> | MSC3   | 1.21                | 0.08 | 0.0574  |
| <i>actin3</i> <sup>n</sup> | MSC12  | 1.05                | 0.04 | 0.2899  |
| <i>actin3</i> <sup>n</sup> | MSC16  | 1.08                | 0.08 | 0.2600  |
| <i>nad9</i>                | Line B | 1.00                | 0.02 | CONTROL |
| <i>nad9</i>                | MSC3   | 1.38                | 0.22 | 0.0782  |
| <i>nad9</i>                | MSC12  | 2.60                | 0.25 | 0.0016* |
| <i>nad9</i>                | MSC16  | 1.88                | 0.16 | 0.0031* |
| <i>cob</i>                 | Line B | 1.00                | 0.02 | CONTROL |
| <i>cob</i>                 | MSC3   | 1.29                | 0.05 | 0.0034* |
| <i>cob</i>                 | MSC12  | 1.47                | 0.20 | 0.0400* |
| <i>cob</i>                 | MSC16  | 1.32                | 0.08 | 0.0096* |
| <i>rps7</i>                | Line B | 1.02                | 0.15 | CONTROL |
| <i>rps7</i>                | MSC3   | 0.92                | 0.16 | 0.3371  |
| <i>rps7</i>                | MSC12  | 0.12                | 0.04 | 0.0021* |
| <i>rps7</i>                | MSC16  | 0.12                | 0.05 | 0.0023* |
| <i>ccmFc</i>               | Line B | 1.00                | 0.04 | CONTROL |
| <i>ccmFc</i>               | MSC3   | 1.31                | 0.16 | 0.0715  |
| <i>ccmFc</i>               | MSC12  | 2.09                | 0.32 | 0.0143* |

|                         |        |      |      |         |
|-------------------------|--------|------|------|---------|
| <i>ccmFc</i>            | MSC16  | 2.38 | 0.75 | 0.0716  |
| <i>nad7</i>             | Line B | 1.00 | 0.07 | CONTROL |
| <i>nad7</i>             | MSC3   | 1.04 | 0.12 | 0.4124  |
| <i>nad7</i>             | MSC12  | 1.23 | 0.18 | 0.1535  |
| <i>nad7</i>             | MSC16  | 1.08 | 0.12 | 0.2998  |
| <i>ccmB</i>             | Line B | 1.05 | 0.23 | CONTROL |
| <i>ccmB</i>             | MSC3   | 1.30 | 0.21 | 0.2366  |
| <i>ccmB</i>             | MSC12  | 1.68 | 0.17 | 0.0482* |
| <i>ccmB</i>             | MSC16  | 1.59 | 0.28 | 0.1039  |
| <i>atp1</i>             | Line B | 1.03 | 0.16 | CONTROL |
| <i>atp1</i>             | MSC3   | 1.16 | 0.14 | 0.2794  |
| <i>atp1</i>             | MSC12  | 2.22 | 0.26 | 0.0089* |
| <i>atp1</i>             | MSC16  | 2.42 | 0.24 | 0.0042* |
| <i>cox1</i>             | Line B | 1.01 | 0.10 | CONTROL |
| <i>cox1</i>             | MSC3   | 1.20 | 0.25 | 0.2568  |
| <i>cox1</i>             | MSC12  | 1.71 | 0.17 | 0.0116* |
| <i>cox1</i>             | MSC16  | 2.04 | 0.28 | 0.0127* |
| <i>nad6</i>             | Line B | 1.01 | 0.10 | CONTROL |
| <i>nad6</i>             | MSC3   | 1.27 | 0.14 | 0.0985  |
| <i>nad6</i>             | MSC12  | 2.15 | 0.17 | 0.0023* |
| <i>nad6</i>             | MSC16  | 2.38 | 0.25 | 0.0039* |
| <i>ubqc<sup>n</sup></i> | Line B | 1.00 | 0.00 | CONTROL |
| <i>ubqc<sup>n</sup></i> | MSC3   | 1.11 | 0.12 | 0.2041  |
| <i>ubqc<sup>n</sup></i> | MSC12  | 1.05 | 0.09 | 0.2886  |
| <i>ubqc<sup>n</sup></i> | MSC16  | 1.03 | 0.10 | 0.3820  |
| <i>sdh3</i>             | Line B | 1.04 | 0.25 | CONTROL |

|             |        |      |      |         |
|-------------|--------|------|------|---------|
| <i>sdh3</i> | MSC3   | 1.23 | 0.07 | 0.2100  |
| <i>sdh3</i> | MSC12  | 2.09 | 0.09 | 0.0048* |
| <i>sdh3</i> | MSC16  | 2.16 | 0.36 | 0.0265* |
| <i>nad3</i> | Line B | 1.02 | 0.16 | CONTROL |
| <i>nad3</i> | MSC3   | 1.43 | 0.16 | 0.0741  |
| <i>nad3</i> | MSC12  | 2.00 | 0.08 | 0.0029* |
| <i>nad3</i> | MSC16  | 1.88 | 0.33 | 0.0402* |
| <i>rrn5</i> | Line B | 1.01 | 0.12 | CONTROL |
| <i>rrn5</i> | MSC3   | 1.05 | 0.10 | 0.4057  |
| <i>rrn5</i> | MSC12  | 1.17 | 0.00 | 0.1311  |
| <i>rrn5</i> | MSC16  | 1.26 | 0.05 | 0.0683  |
| <i>rpl2</i> | Line B | 1.00 | 0.04 | CONTROL |
| <i>rpl2</i> | MSC3   | 1.00 | 0.08 | 0.4799  |
| <i>rpl2</i> | MSC12  | 1.86 | 0.07 | 0.0003* |
| <i>rpl2</i> | MSC16  | 2.10 | 0.12 | 0.0006* |
| <i>rps3</i> | Line B | 1.01 | 0.12 | CONTROL |
| <i>rps3</i> | MSC3   | 1.40 | 0.16 | 0.0660  |
| <i>rps3</i> | MSC12  | 2.31 | 0.20 | 0.0025* |
| <i>rps3</i> | MSC16  | 2.53 | 0.20 | 0.0015* |
| <i>rpl5</i> | Line B | 1.00 | 0.07 | CONTROL |
| <i>rpl5</i> | MSC3   | 1.38 | 0.19 | 0.0710  |
| <i>rpl5</i> | MSC12  | 2.05 | 0.32 | 0.0171* |
| <i>rpl5</i> | MSC16  | 2.86 | 0.34 | 0.0030* |
| <i>nad5</i> | Line B | 1.03 | 0.19 | CONTROL |
| <i>nad5</i> | MSC3   | 0.36 | 0.11 | 0.0194* |
| <i>nad5</i> | MSC12  | 1.85 | 0.39 | 0.0661  |

|                           |        |       |       |         |
|---------------------------|--------|-------|-------|---------|
| <i>nad5</i>               | MSC16  | 1.47  | 0.20  | 0.0931  |
| <i>atp4</i>               | Line B | 1.03  | 0.19  | CONTROL |
| <i>atp4</i>               | MSC3   | 0.43  | 0.04  | 0.0182* |
| <i>atp4</i>               | MSC12  | 1.69  | 0.31  | 0.0724  |
| <i>atp4</i>               | MSC16  | 1.88  | 0.19  | 0.0170* |
| <i>rrn5</i>               | Line B | 1.01  | 0.12  | CONTROL |
| <i>rrn5</i>               | MSC3   | 1.06  | 0.11  | 0.4046  |
| <i>rrn5</i>               | MSC12  | 1.29  | 0.06  | 0.0556  |
| <i>rrn5</i>               | MSC16  | 1.39  | 0.11  | 0.0432* |
| <i>aox<sup>nm</sup></i>   | Line B | 1.00  | 0.07  | CONTROL |
| <i>aox<sup>nm</sup></i>   | MSC3   | 1.21  | 0.22  | 0.2082  |
| <i>aox<sup>nm</sup></i>   | MSC12  | 1.00  | 0.07  | 0.4992  |
| <i>aox<sup>nm</sup></i>   | MSC16  | 1.24  | 0.10  | 0.0640  |
| <i>porin<sup>nm</sup></i> | Line B | 1.16  | 0.47  | CONTROL |
| <i>porin<sup>nm</sup></i> | MSC3   | 34.74 | 33.31 | 0.1853  |
| <i>porin<sup>nm</sup></i> | MSC12  | 0.80  | 0.20  | 0.2589  |
| <i>porin<sup>nm</sup></i> | MSC16  | 2.34  | 1.03  | 0.1788  |
| <i>cox2</i>               | Line B | 1.00  | 0.07  | CONTROL |
| <i>cox2</i>               | MSC3   | 1.12  | 0.30  | 0.3596  |
| <i>cox2</i>               | MSC12  | 1.79  | 0.14  | 0.0040* |
| <i>cox2</i>               | MSC16  | 1.95  | 0.04  | 0.0002* |
| <i>rps13</i>              | Line B | 1.04  | 0.21  | CONTROL |
| <i>rps13</i>              | MSC3   | 1.33  | 0.23  | 0.1968  |
| <i>rps13</i>              | MSC12  | 2.19  | 0.00  | 0.0025* |
| <i>rps13</i>              | MSC16  | 2.05  | 0.30  | 0.0253* |
| <i>mttb</i>               | Line B | 1.06  | 0.26  | CONTROL |

|              |        |      |      |         |
|--------------|--------|------|------|---------|
| <i>mttb</i>  | MSC3   | 1.42 | 0.11 | 0.1383  |
| <i>mttb</i>  | MSC12  | 2.46 | 0.06 | 0.0033* |
| <i>mttb</i>  | MSC16  | 2.26 | 0.23 | 0.0130* |
| <i>rps10</i> | Line B | 1.00 | 0.08 | CONTROL |
| <i>rps10</i> | MSC3   | 1.12 | 0.05 | 0.1431  |
| <i>rps10</i> | MSC12  | 2.02 | 0.24 | 0.0080* |
| <i>rps10</i> | MSC16  | 2.25 | 0.13 | 0.0007* |
| <i>atp8</i>  | Line B | 1.00 | 0.04 | CONTROL |
| <i>atp8</i>  | MSC3   | 1.15 | 0.09 | 0.0998  |
| <i>atp8</i>  | MSC12  | 1.55 | 0.04 | 0.0003* |
| <i>atp8</i>  | MSC16  | 1.82 | 0.04 | 0.0001* |
| <i>rrnL</i>  | Line B | 1.00 | 0.04 | CONTROL |
| <i>rrnL</i>  | MSC3   | 1.25 | 0.15 | 0.0952  |
| <i>rrnL</i>  | MSC12  | 3.03 | 0.68 | 0.0207* |
| <i>rrnL</i>  | MSC16  | 2.25 | 0.53 | 0.0400* |

\* Significant difference between an MSC mutant for a given mitochondrial or nuclear gene compared to wild-type B at  $\alpha = 0.05$ , Student's t-test.

<sup>n</sup> Nuclear-encoded gene with no function in the mitochondria.

<sup>nm</sup> Nuclear-encoded mitochondrially targeted gene.
