# Supplementary material for: The Mosaic Mutants of Cucumber: A Method to Produce Knock-Downs of Mitochondrial Transcripts
Source: PubMed Central journal article supplement (PMC4478549; doi:10.1534/g3.115.017053), 2015-04-14
Supplement: supp_g3.115.017053_TableS3.pdf [file supp_g3.115.017053_TableS3.pdf]

**Table S3** Fold change in transcript levels of mitochondrial and nuclear genes from wild-type inbred B and mitochondrial mutants MSC3, 12 and 16.

| Gene        | Line   | Average Fold-change | S.E. | t-test  |
|-------------|--------|---------------------|------|---------|
| <i>rps7</i> | Line B | 1.12                | 0.18 | CONTROL |
| <i>rps7</i> | MSC3   | 2.32                | 0.34 | 0.0044* |
| <i>rps7</i> | MSC12  | 0.21                | 0.07 | 0.0005* |
| <i>rps7</i> | MSC16  | 0.36                | 0.08 | 0.0016* |
| <i>rrn5</i> | Line B | 1.05                | 0.12 | CONTROL |
| <i>rrn5</i> | MSC3   | 1.67                | 0.49 | 0.1246  |
| <i>rrn5</i> | MSC12  | 1.15                | 0.19 | 0.3181  |
| <i>rrn5</i> | MSC16  | 1.16                | 0.16 | 0.2837  |
| <i>rpl2</i> | Line B | 1.09                | 0.37 | CONTROL |
| <i>rpl2</i> | MSC3   | 1.76                | 0.47 | 0.0148* |
| <i>rpl2</i> | MSC12  | 2.00                | 0.29 | 0.0087* |
| <i>rpl2</i> | MSC16  | 2.00                | 0.31 | 0.0118* |
| <i>nad3</i> | Line B | 1.31                | 0.32 | CONTROL |
| <i>nad3</i> | MSC3   | 2.06                | 0.46 | 0.1028  |
| <i>nad3</i> | MSC12  | 2.92                | 0.46 | 0.0041* |
| <i>nad3</i> | MSC16  | 4.75                | 1.14 | 0.0087* |
| <i>sdh3</i> | Line B | 1.08                | 0.16 | CONTROL |
| <i>sdh3</i> | MSC3   | 2.08                | 0.48 | 0.0395* |
| <i>sdh3</i> | MSC12  | 2.05                | 0.43 | 0.0256* |
| <i>sdh3</i> | MSC16  | 1.85                | 0.42 | 0.0583  |
| <i>nad6</i> | Line B | 1.23                | 0.28 | CONTROL |
| <i>nad6</i> | MSC3   | 1.55                | 0.31 | 0.2295  |
| <i>nad6</i> | MSC12  | 2.54                | 0.64 | 0.0379* |

|                           |        |      |      |         |
|---------------------------|--------|------|------|---------|
| <i>nad6</i>               | MSC16  | 2.57 | 0.66 | 0.0435* |
| <i>ubqc<sup>n</sup></i>   | Line B | 1.09 | 0.35 | CONTROL |
| <i>ubqc<sup>n</sup></i>   | MSC3   | 1.51 | 0.80 | 0.1613  |
| <i>ubqc<sup>n</sup></i>   | MSC12  | 1.11 | 0.21 | 0.4583  |
| <i>ubqc<sup>n</sup></i>   | MSC16  | 1.36 | 0.25 | 0.1873  |
| <i>nad9</i>               | Line B | 1.43 | 0.48 | CONTROL |
| <i>nad9</i>               | MSC3   | 2.13 | 0.40 | 0.1391  |
| <i>nad9</i>               | MSC12  | 4.40 | 1.11 | 0.0122* |
| <i>nad9</i>               | MSC16  | 5.21 | 1.71 | 0.0309* |
| <i>cob</i>                | Line B | 1.19 | 0.25 | CONTROL |
| <i>cob</i>                | MSC3   | 1.92 | 0.26 | 0.0301* |
| <i>cob</i>                | MSC12  | 2.13 | 0.34 | 0.0156* |
| <i>cob</i>                | MSC16  | 3.13 | 0.71 | 0.0142* |
| <i>actin3<sup>n</sup></i> | Line B | 3.46 | 2.54 | CONTROL |
| <i>actin3<sup>n</sup></i> | MSC3   | 3.15 | 0.86 | 0.4545  |
| <i>actin3<sup>n</sup></i> | MSC12  | 2.88 | 1.41 | 0.4222  |
| <i>actin3<sup>n</sup></i> | MSC16  | 3.99 | 0.87 | 0.4244  |
| <i>rps10</i>              | Line B | 1.19 | 0.50 | CONTROL |
| <i>rps10</i>              | MSC3   | 1.90 | 1.32 | 0.1541  |
| <i>rps10</i>              | MSC12  | 1.89 | 0.41 | 0.0790  |
| <i>rps10</i>              | MSC16  | 2.64 | 0.53 | 0.0143* |
| <i>rps3</i>               | Line B | 1.09 | 0.17 | CONTROL |
| <i>rps3</i>               | MSC3   | 1.21 | 0.20 | 0.3276  |
| <i>rps3</i>               | MSC12  | 2.04 | 0.34 | 0.0097* |
| <i>rps3</i>               | MSC16  | 1.93 | 0.37 | 0.0328* |
| <i>mttb</i>               | Line B | 1.07 | 0.16 | CONTROL |

|                         |        |      |      |         |
|-------------------------|--------|------|------|---------|
| <i>mttb</i>             | MSC3   | 1.57 | 0.34 | 0.1084  |
| <i>mttb</i>             | MSC12  | 2.01 | 0.32 | 0.0067* |
| <i>mttb</i>             | MSC16  | 1.82 | 0.24 | 0.0113* |
| <i>atp4</i>             | Line B | 1.03 | 0.09 | CONTROL |
| <i>atp4</i>             | MSC3   | 0.47 | 0.07 | 0.0001* |
| <i>atp4</i>             | MSC12  | 1.12 | 0.19 | 0.3112  |
| <i>atp4</i>             | MSC16  | 1.01 | 0.14 | 0.4523  |
| <i>cox2</i>             | Line B | 1.03 | 0.18 | CONTROL |
| <i>cox2</i>             | MSC3   | 1.12 | 0.24 | 0.2669  |
| <i>cox2</i>             | MSC12  | 1.25 | 0.15 | 0.1114  |
| <i>cox2</i>             | MSC16  | 1.32 | 0.18 | 0.0917  |
| <i>aox<sup>nm</sup></i> | Line B | 1.03 | 0.10 | CONTROL |
| <i>aox<sup>nm</sup></i> | MSC3   | 1.94 | 0.22 | 0.0017* |
| <i>aox<sup>nm</sup></i> | MSC12  | 2.33 | 0.27 | 0.0003* |
| <i>aox<sup>nm</sup></i> | MSC16  | 2.66 | 0.35 | 0.0007* |
| <i>rrnS</i>             | Line B | 1.06 | 0.13 | CONTROL |
| <i>rrnS</i>             | MSC3   | 1.35 | 0.18 | 0.1090  |
| <i>rrnS</i>             | MSC12  | 0.73 | 0.12 | 0.0383* |
| <i>rrnS</i>             | MSC16  | 0.82 | 0.11 | 0.0905  |
| <i>rps13</i>            | Line B | 1.10 | 0.17 | CONTROL |
| <i>rps13</i>            | MSC3   | 1.35 | 0.11 | 0.1150  |
| <i>rps13</i>            | MSC12  | 2.85 | 0.39 | 0.0003* |
| <i>rps13</i>            | MSC16  | 2.82 | 0.71 | 0.0213* |
| <i>rpl5</i>             | Line B | 1.09 | 0.39 | CONTROL |
| <i>rpl5</i>             | MSC3   | 1.81 | 0.45 | 0.0112* |
| <i>rpl5</i>             | MSC12  | 2.27 | 0.57 | 0.0396* |

|             |        |      |      |         |
|-------------|--------|------|------|---------|
| <i>rpl5</i> | MSC16  | 2.05 | 0.23 | 0.0026* |
| <i>atp8</i> | Line B | 1.02 | 0.08 | CONTROL |
| <i>atp8</i> | MSC3   | 1.09 | 0.23 | 0.3999  |
| <i>atp8</i> | MSC12  | 1.33 | 0.23 | 0.0916  |
| <i>atp8</i> | MSC16  | 1.45 | 0.22 | 0.0504  |
| <i>nad5</i> | Line B | 1.13 | 0.22 | CONTROL |
| <i>nad5</i> | MSC3   | 0.14 | 0.02 | 0.0011* |
| <i>nad5</i> | MSC12  | 1.28 | 0.34 | 0.3535  |
| <i>nad5</i> | MSC16  | 1.16 | 0.27 | 0.4686  |
| <i>rrnL</i> | Line B | 1.06 | 0.12 | CONTROL |
| <i>rrnL</i> | MSC3   | 1.15 | 0.21 | 0.3519  |
| <i>rrnL</i> | MSC12  | 1.19 | 0.30 | 0.3461  |
| <i>rrnL</i> | MSC16  | 1.51 | 0.28 | 0.0843  |
| <i>cox1</i> | Line B | 1.13 | 0.41 | CONTROL |
| <i>cox1</i> | MSC3   | 1.58 | 0.68 | 0.1262  |
| <i>cox1</i> | MSC12  | 1.85 | 0.58 | 0.1347  |
| <i>cox1</i> | MSC16  | 3.07 | 1.03 | 0.0500* |
| <i>atp1</i> | Line B | 1.11 | 0.19 | CONTROL |
| <i>atp1</i> | MSC3   | 2.05 | 0.24 | 0.0039* |
| <i>atp1</i> | MSC12  | 1.77 | 0.57 | 0.1510  |
| <i>atp1</i> | MSC16  | 1.91 | 0.50 | 0.0849  |
| <i>nad1</i> | Line B | 1.03 | 0.08 | CONTROL |
| <i>nad1</i> | MSC3   | 0.95 | 0.14 | 0.3251  |
| <i>nad1</i> | MSC12  | 1.08 | 0.32 | 0.4367  |
| <i>nad1</i> | MSC16  | 1.18 | 0.31 | 0.3286  |
| <i>nad7</i> | Line B | 1.05 | 0.11 | CONTROL |

|                           |        |      |      |         |
|---------------------------|--------|------|------|---------|
| <i>nad7</i>               | MSC3   | 1.16 | 0.16 | 0.2910  |
| <i>nad7</i>               | MSC12  | 1.06 | 0.25 | 0.4889  |
| <i>nad7</i>               | MSC16  | 1.19 | 0.25 | 0.3109  |
| <i>ccmB</i>               | Line B | 1.10 | 0.31 | CONTROL |
| <i>ccmB</i>               | MSC3   | 2.15 | 1.41 | 0.0784  |
| <i>ccmB</i>               | MSC12  | 1.55 | 0.19 | 0.0400* |
| <i>ccmB</i>               | MSC16  | 2.30 | 0.40 | 0.0090* |
| <i>porin</i> <sup>n</sup> | Line B | 1.08 | 0.15 | CONTROL |
| <i>porin</i> <sup>n</sup> | MSC3   | 1.01 | 0.19 | 0.3941  |
| <i>porin</i> <sup>n</sup> | MSC12  | 0.80 | 0.23 | 0.1624  |
| <i>porin</i> <sup>n</sup> | MSC16  | 0.87 | 0.16 | 0.1690  |
| <i>ccmFc</i>              | Line B | 1.08 | 0.15 | CONTROL |
| <i>ccmFc</i>              | MSC3   | 1.34 | 0.22 | 0.1781  |
| <i>ccmFc</i>              | MSC12  | 2.81 | 0.71 | 0.0176* |
| <i>ccmFc</i>              | MSC16  | 2.34 | 0.47 | 0.0145* |
| <i>gadph</i> <sup>n</sup> | Line B | 1.03 | 0.08 | CONTROL |
| <i>gadph</i> <sup>n</sup> | MSC3   | 1.32 | 0.17 | 0.0829  |
| <i>gadph</i> <sup>n</sup> | MSC12  | 1.17 | 0.17 | 0.2137  |
| <i>gadph</i> <sup>n</sup> | MSC16  | 1.14 | 0.26 | 0.3495  |

\* Significant difference between an MSC mutant for a given mitochondrial or nuclear gene compared to wild-type

B at  $\alpha = 0.05$ , Student's t-test.

<sup>n</sup> Nuclear-encoded gene with no function in the mitochondria.

<sup>nm</sup> Nuclear-encoded mitochondrially targeted gene.
