# Supplementary material for: The Mosaic Mutants of Cucumber: A Method to Produce Knock-Downs of Mitochondrial Transcripts
Source: PubMed Central journal article supplement (PMC4478549; doi:10.1534/g3.115.017053), 2015-04-14
Supplement: supp_g3.115.017053_TableS4.pdf [file supp_g3.115.017053_TableS4.pdf]

**Table S4 Primer sequences that were used for quantitative-PCR.**

| Location    | Gene            | Forward Primer          | Reverse Primer          |
|-------------|-----------------|-------------------------|-------------------------|
| Nuclear     | <i>gadph</i>    | AGGAAGAGTCCGAGGGAAAA    | ACGAGGATGTGAAGCCAAAC    |
|             | <i>aox2</i>     | GCACCATCAGCCCAAAAC      | AGCATCCCTCCAACCATTC     |
|             | <i>ubqc</i>     | CACAGCTCGATATTGGACAGA   | AATTTTCATCCCAACCCACA    |
|             | <i>actin3</i>   | CCAAGGCGAATAGAGAGAAAA   | GCAACATACATAGCGGGAGTG   |
| Complex I   | <i>nad9</i>     | ACAAACCAGTGCAGACGAAG    | CCGGATGATTGATGGAAGAA    |
|             | <i>nad7</i>     | GCAGCACCTTACGATGTTCA    | TGTCGCATCTCTTCGATACG    |
|             | <i>nad6</i>     | TCCGTCTGGTTTTTGTCTTC    | GTGGTTCTGTCGTCCTCCTC    |
|             | <i>nad3</i>     | CACTCGGTCTTCCTTTTCCA    | AACGACTTCTGGCATCACC     |
|             | <i>nad5 ex4</i> | AGGATATTAGGGGAAGCAGTGAG | CCAAGAAGATAGAGAGTCCCACA |
| Complex II  | <i>sdh3</i>     | TGGGTTTGATTTGCTTCACC    | CGACGGATATTAGGATGAGCTTT |
| Complex III | <i>cob</i>      | CTTGGTGAATAGGGCGAAAA    | TGACAAAGCGGGAGGTGTAG    |
| Complex IV  | <i>cox1</i>     | TTCCCATGCATTTCTTAGGG    | AACGACGAATCCCAACTACG    |
|             | <i>cox2</i>     | GATCTCAAGACGCAGCAACA    | CATAAAGCGCGAACCAAGA     |
|             | <i>ccmFc</i>    | GCCTCATTTCTTTCTTCC      | TCACGTTTCGCTGAACTATG    |
|             | <i>ccmB</i>     | CGGAATGGATCGGTAAACA     | AAGAGCCGAACGAGAATGAA    |
| Complex V   | <i>atp1</i>     | TGAAACACAAGCTGGAGACG    | ACACGACTGACGGATAAGCC    |
|             | <i>atp4</i>     | GCAGCAATTTCCAATCCT      | TGCACTGTCTTTTCGCACTT    |
|             | <i>atp8</i>     | TGCCTTTCTTCTTGACTTTCT   | TCCTTGCTCCGTATGTTCTTC   |
| Ribosome LU | <i>rpl2</i>     | AGCCAAGAGGGGAGAGCA      | CCGAGAAGAACGATTAGGG     |
|             | <i>rpl5</i>     | GCCCGGAGAATTTAAGAAAGA   | TGACCTAGCACGAGAAAGCA    |
|             | <i>rrnL</i>     | GTCAGCGAGAAAATGGGAAC    | CGGGTCAAATAGGAAGAACGA   |
| Ribosome SU | <i>rrn5</i>     | AGCGATCGACGTGAAAACAC    | TCCTTCATTAAGCCGC        |
|             | <i>rrnS</i>     | TGCGCTTTAGTTTGATTGCT    | AGTCTGAGGACCCGTTTTGG    |
|             | <i>rps7</i>     | TGACGATCCCTGGCTACAA     | ATGGTTGAGGCCGTAGAGAA    |
|             | <i>rps13</i>    | GTCTGCTCGTTCTCCCCTCT    | AAAAAGCCATTAGGTTTCGTT   |
|             | <i>rps10</i>    | GGAAGATTGGATTGCCTGAA    | ATGCCTTTCTGTTTTATGACC   |
|             | <i>rps3</i>     | GGAGCGAATACACAGGGAAG    | CGAAGAAAGGAAAGAGCGAGA   |
